# Supplementary material for: Structural insights into thyrotropin-releasing hormone receptor activation by an endogenous peptide agonist or its orally administered analogue
Source: PubMed Central journal article supplement (PMC9437008; doi:10.1038/s41422-022-00646-6), 2022-03-29
Supplement: 41422_2022_646_MOESM1_ESM.pdf [file 41422_2022_646_MOESM1_ESM.pdf]

# Supplementary Materials for

## Structural Insights into Thyrotropin-Releasing Hormone Receptor Activation by an Endogenous Peptide Agonist or its Oral-administered Analogue

### Materials and Methods

#### Construct design

The full-length gene coding sequence of human TRHR was synthesized with no additional mutations or loop deletions. The DNA sequence of TRHR was cloned into *pFastBac1* vector with N-terminal thermostabilized apocytochrome b<sub>562</sub>RIL (BRIL) epitope followed by a HA signal sequence and FLAG tag, and the C-terminal was attached with a 2 × MBP tag to facilitate the protein expression and purification. The NanoBiT tethering strategy was applied by fusing a LgBiT subunit (Promega) at the receptor C-terminus using homologous recombination to improve protein homogeneity and stability. The mini-Gαq chimeric construct refers to the 5HT<sub>2A</sub>-miniGq complex (PDB: 6WHA). All the three G protein complex components, miniGαq, *rat* Gβ1 and *bovine* Gγ2, were constructed into *pFastbac* vector, respectively. The HiBiT (Promega) was fused to the C-terminus of *Rat* Gβ1 with a 15-amino acid (15 aa) polypeptide linker (GSSGGGGSGGGGSSG).

#### Protein expression and purification

Baculoviruses were prepared using the Bac-to-Bac Baculovirus Expression System (Invitrogen). *Sf9* insect cells were cultured to a density of  $3 \times 10^6$  cells per mL and co-infected with baculovirus encoding TRHR-LgBiT, miniGαq, Gβ1-15AA-HiBiT, Gγ2, and scFv16 protein at the ratio of 1:1:1:1. The transfected *Sf9* cells were grown at 27 °C for 48 h and then were collected by centrifugation at 1000 x g (Beckman) for 20 min and keep frozen at -80 °C for further usage. The frozen cells were thawed on ice and resuspended in lysis buffer containing 20 mM HEPES, pH 7.5, 100 mM NaCl, 10% (v/v) glycerol, 10 mM MgCl<sub>2</sub>, 5 mM CaCl<sub>2</sub>, 100 μM TCEP and supplemented with protease inhibitor cocktail (Apexbt). Cells were lysed by dounce

homogenization and complex formation was initiated with the addition of 10  $\mu\text{g}/\text{mL}$  ScFv16, 25 mU/mL Apyrase (Sigma-Aldrich) and 10  $\mu\text{M}$  protirelin or 30  $\mu\text{M}$  taltirelin (MCE) for 2 h at room temperature (RT). The membrane was then solubilized by adding 1.0% (w/v) n-dodecyl- $\beta$ -d-maltopyranoside (DDM, Anatrace), 0.2% (w/v) cholesteryl hemisuccinate (CHS, Sigma-Aldrich) for 2 h at 4°C. The sample was clarified by centrifugation at 30,000 rpm for 30 min and the supernatant was then incubated with MBP resin (BioLabs) for 3 h at 4°C. After incubation, the resin was loaded into a gravity flow column, followed by wash 1 buffer of 20 mM HEPES, pH 7.5, 100 mM NaCl, 5 mM  $\text{MgCl}_2$ , 5  $\mu\text{M}$  protirelin or 10  $\mu\text{M}$  taltirelin, 25  $\mu\text{M}$  TCEP, 0.1% (w/v) LMNG and 0.02% (w/v) CHS and then, with wash 2 buffer of 20 mM HEPES, pH 7.5, 100 mM NaCl, 5 mM  $\text{MgCl}_2$ , 5  $\mu\text{M}$  protirelin or 10  $\mu\text{M}$  taltirelin, 25  $\mu\text{M}$  TCEP, 0.03% (w/v) LMNG and 0.006% (w/v) CHS. Then use 5 column volumes of wash 2 buffer to resuspend the MBP resin and add 0.5 mg TEV enzyme for digestion overnight at 4°C. The purified TRHR-miniGq complex was concentrated using an Amicon Ultra centrifugal filter (molecular weight cut-off of 50 kDa, Millipore) and then loaded on to a Superdex 200 Increase 10/300 GL column (GE Healthcare) that was pre-equilibrated with buffer containing 20 mM HEPES, pH 7.5, 100 mM NaCl, 2 mM  $\text{MgCl}_2$ , 100  $\mu\text{M}$  TCEP, 5  $\mu\text{M}$  protirelin or 10  $\mu\text{M}$  taltirelin, 0.001% (w/v) LMNG and 0.0002% (w/v) CHS. The eluted fractions of monomeric complex were collected and concentrated to 0.8 mg/mL for cryo-EM grids preparation.

### **Cryo-EM grid preparation and data collection**

For the preparation of cryo-EM grids, 3  $\mu\text{L}$  of the purified TRHR-Gq/TRH or TRHR-Gq/TAL complexes at 0.8 mg/ml were applied onto a freshly plasma-cleaned holey carbon grid (GryoMatrix-M024, R1.2/1.3, 300 mesh, Au). Grids were blotted for 9 s and plunge-frozen in liquid ethane cooled by liquid nitrogen using a Vitrobot Mark IV (ThermoFisher Scientific) at 4°C and with 100% humidity.

Cryo-EM imaging was performed on a Titan Krios electron microscope at 300 kV accelerating voltage using a Gatan K3 Summit direct electron detector with a Gatan energy filter in the Center of Cryo-Electron Microscopy, University of Science and Technology of China (Hefei, China). A total of 3,687 movies for TRHR-Gq/TRH complex and 3,321 movies of TRHR-Gq/TAL complex were collected with a nominal magnification of 81,000  $\times$ , corresponding to a pixel size

of 1.07 Å using the EPU software. Each movies stack was recorded for a total of 3.5 s and 30 frames per micrograph with a defocus range of -1.2 to -2.2 µm.

### **Image processing and map construction**

Dose-fractionated image stacks were subjected to beam-induced motion correction using MotionCor2 (v1.0.6). The processed images were transferred to CryoSPARC (v3.0)<sup>1</sup> and contrast transfer function (CTF) estimation was performed with patch CTF estimation. Following CTF estimation, auto-picking particles were extracted by four-time downscaling resulting in the pixel size of 4.28 Å. After two rounds of 2D classification, the particles from well-defined 2D averages were extracted with a pixel size of 2.14 Å for further ab-initio reconstruction and heterogeneous refinement. After several rounds of heterogeneous refinement, the selected subset of particles from heterogeneous refinement were extracted with a pixel size of 1.07 Å. Followed homogeneous refinement and Non-uniform refinement yielded a density map with 3.19 Å of TRHR-Gq/TRH complex and 3.26 Å of TRHR-Gq/TAL complex.

### **Model building and refinement**

The initial model for the human TRHR receptor was derived from inactive state TRHR which simulated by AlphaFold followed by extensive remodeling using COOT<sup>2</sup>. And the miniGαqβγ heterotrimer was derived from 5HT<sub>2A</sub>-miniGq complex (PDB code: 6WHA). The N-terminal residues 1-24, ICL3 residues 222-261 and C-terminal residues 335-398 of TRHR receptor were not built due to the lack of corresponding densities. Structure refinement and model validation were performed using phenix.real\_space\_refine module in PHENIX<sup>3</sup>. The final model was subjected to refinement and validation in PHENIX. Figures were prepared using UCSF Chimera<sup>4</sup> or UCSF Chimera X<sup>5</sup>.

### **Ca<sup>2+</sup> mobilization assay**

HEK293T cells were transiently transfected with wide-type or mutant TRHR for 24 h. Then cells were seeded at a density of  $6 \times 10^4$  cells per well into 96-well culture plates and incubated overnight at 37 °C in 5% CO<sub>2</sub>. The Cells were washed with fresh calcium buffer (HBSS (Gibco 14025) supplemented with 20mM HEPES, 0.1% BSA and 2.5mM probenecid; pH 7.4) and then

incubated with 2  $\mu$ M Fluro-4 AM (Thermo Fisher Scientific, F14201) in calcium buffer at 37 °C for 45 min. The plate was washed once and added with 50  $\mu$ L calcium buffer per well before measuring. Different concentrations of TRH or TAL were added, followed by an analysis of intracellular calcium mobilization on a FLIPR instrument (Molecular Devices) with excitation at 488 nm and emission at 540 nm. The fluorescence intensity was measured at 1-s intervals for 410 s. Data were normalized to the baseline response of the ligand. Data was analyzed using nonlinear regression in GraphPad Prism software 9.0.

### **IP-one accumulation signaling assay**

HEK293T cells were cultured in DMEM (Gibco, Thermo Fisher Scientific) supplemented with 10% FBS and 1% penicillin/streptomycin at 37°C and 5% CO<sub>2</sub>. The cells were transiently transfected with wild-type or mutant TRHR using Lipofectamine 3000 (Thermo Fisher Scientific). Twenty-four hours post-transfection, IP1 experiments were performed using an IP-one assay kit (Cisbio, 62IPAPEC) according to the kit instructions. In brief, cells were harvested and seeded in 384-well plates (7  $\mu$ L, 12000 cells per well) and incubated with increased concentrations of protirelin or taltirelin at 37 °C for 1 h. After incubation, 3  $\mu$ L of d<sub>2</sub>-labeled IP1 and 3  $\mu$ L of cryptate-labeled anti-IP1 antibody (1:20 diluted in lysis and detection buffer) were added to each well. The fluorescence signal was measured by a CLARIOstar microplate reader with excitation at 330 nm and emission at 620 nm and 665 nm. The data were analyzed using GraphPad Prism software 9.0.

### Supplementary Reference:

- 1 Punjani, A. *et al.* cryoSPARC: algorithms for rapid unsupervised cryo-EM structure determination. *Nat. Methods* **14**, 290 – 296 (2017).
- 2 Emsley, P. & Cowtan, K. Coot: model-building tools for molecular graphics. *Acta crystallographica. Section D, Biological crystallography* **60**, 2126-2132 (2004).
- 3 Afonine, P. V. *et al.* Real-space refinement in PHENIX for cryo-EM and crystallography. *Acta Crystallogr D Struct Biol* **74**, 531 – 544 (2018).
- 4 Pettersen, E. F. *et al.* UCSF Chimera--a visualization system for exploratory research and analysis. *J Comput Chem* **25**, 1605-1612 (2004).
- 5 Pettersen, E. F. *et al.* UCSF ChimeraX: Structure visualization for researchers, educators, and developers. *Protein Sci.* **30**, 70 – 82 (2021).

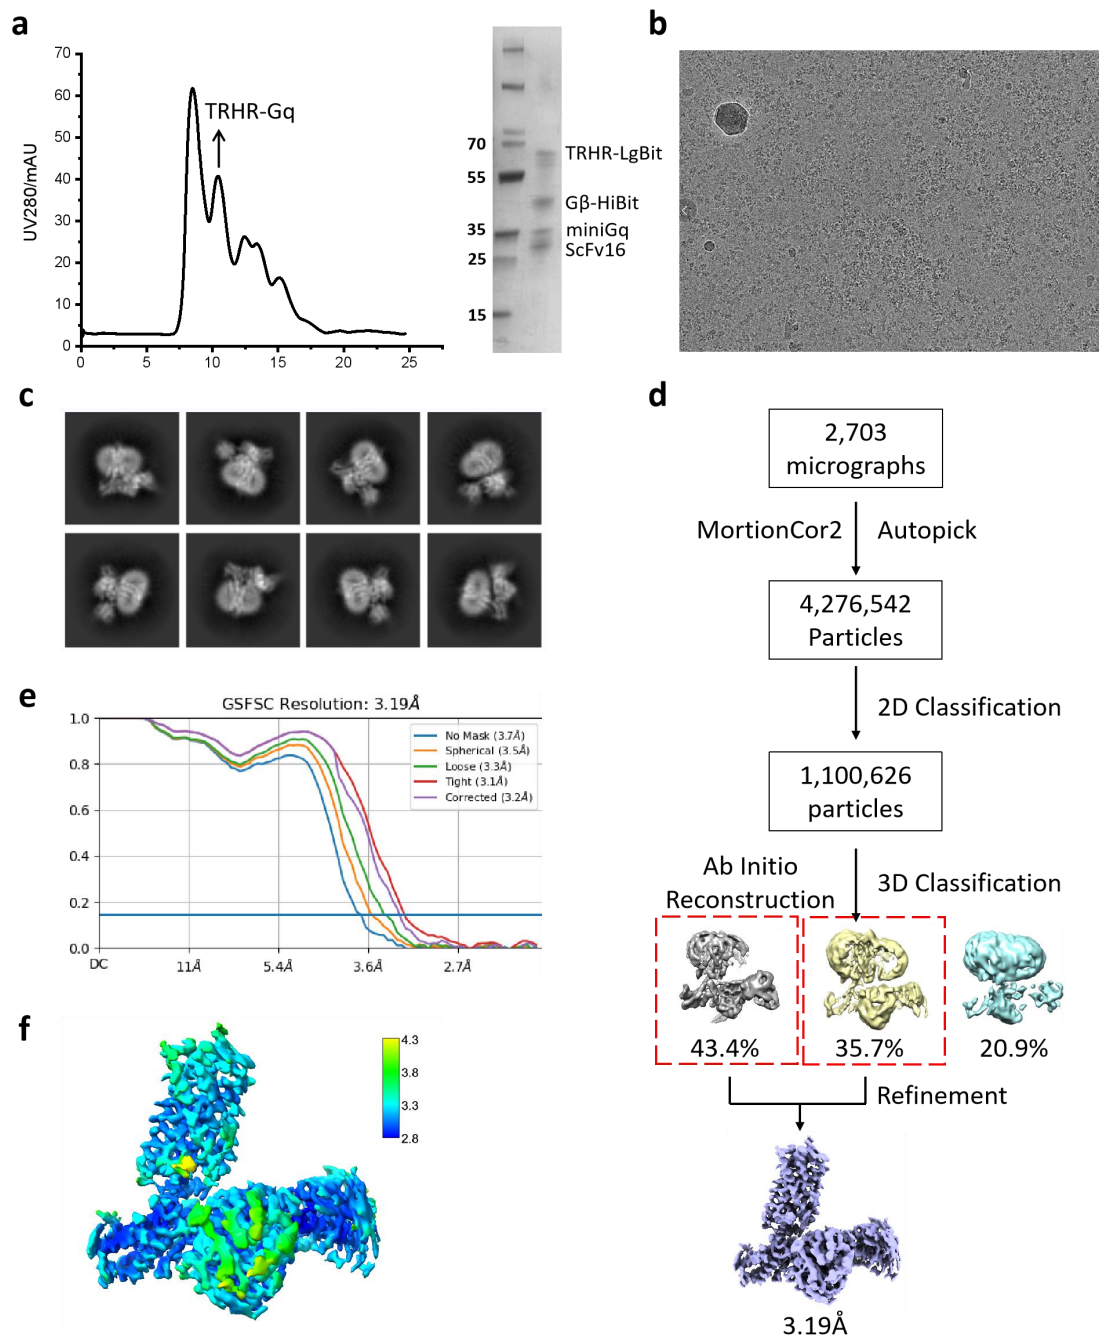

**Fig. S1 Purification and cryo-EM data processing of protirelin bound TRHR-Gq complex.**

**a** Size-exclusion chromatography profile and SDS-PAGE analysis of TRHR-Gq complex bound with protirelin (TRH). **b** Representative micrograph after motion correction and dose weighting. **c** 2D class averages of TRHR-Gq complex bound with protirelin (TRH). **d** Flow chart of cryo-EM data processing using cryoSPARC. **e** Gold-standard FSC validation curves from cryoSPARC. **f** Density map of TRH-TRHR-Gq complex colored by local resolution estimation.

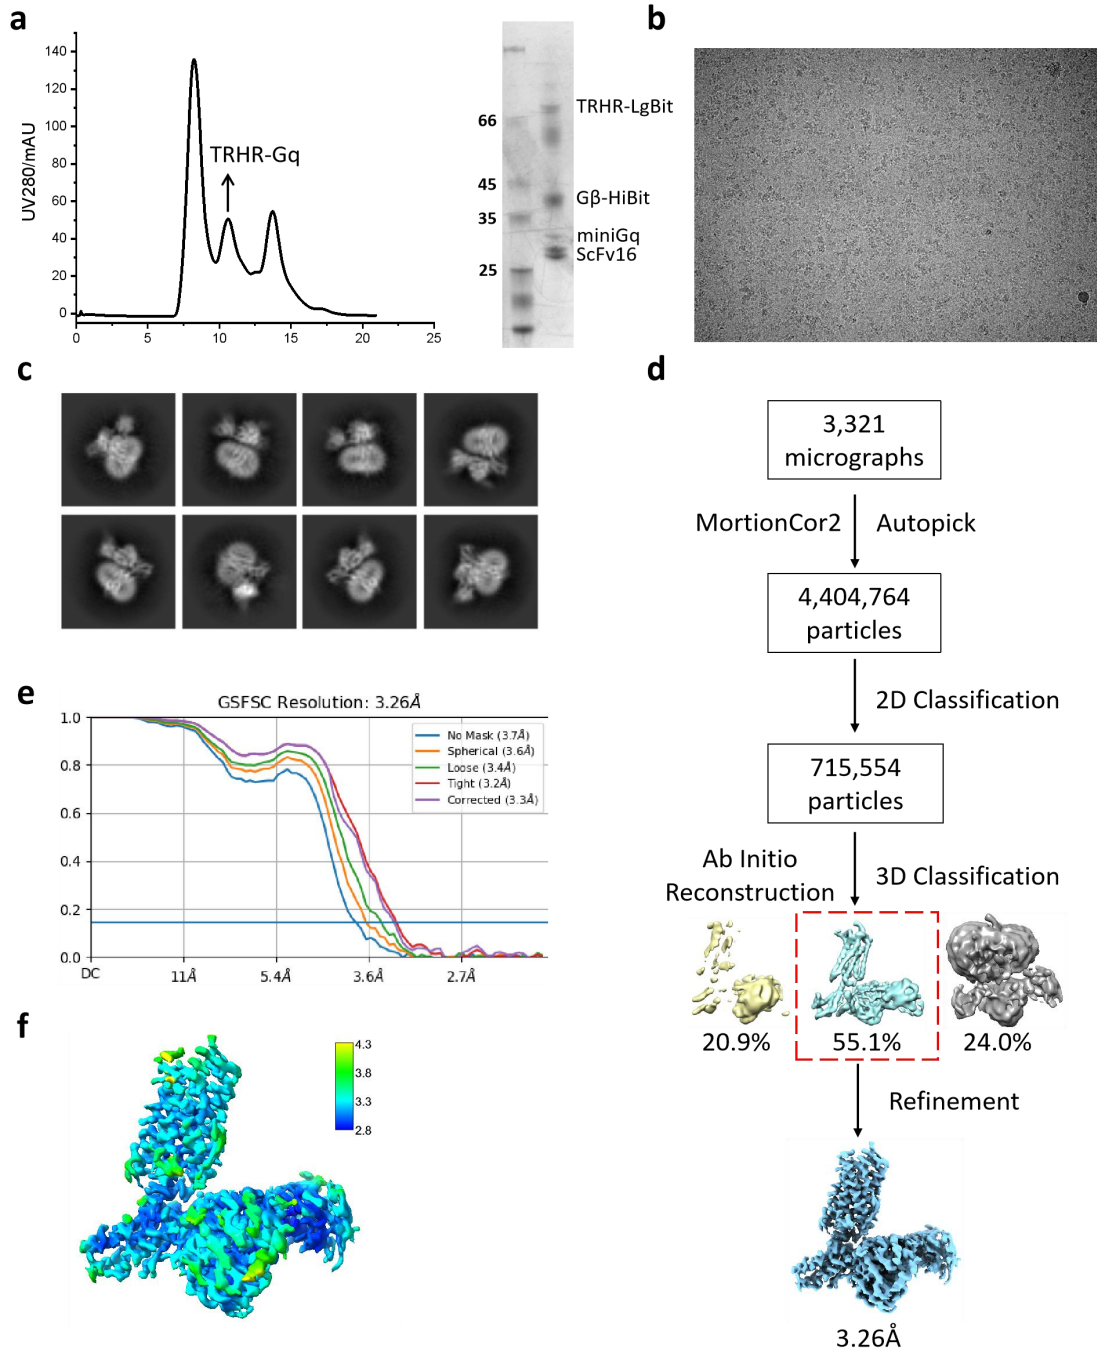

**Fig. S2 Purification and cryo-EM data processing of taltirelin bound TRHR-Gq complex.**

**a** Size-exclusion chromatography profile and SDS-PAGE analysis of TRHR-Gq complex bound with taltirelin (TAL). **b** Representative micrograph after motion correction and dose weighting. **c** 2D class averages of TRHR-Gq complex bound with taltirelin (TAL). **d** Flow chart of cryo-EM data processing using cryoSPARC. **e** Gold-standard FSC validation curves from cryoSPARC. **f** Density map of TAL-TRHR-Gq complex colored by local resolution estimation.

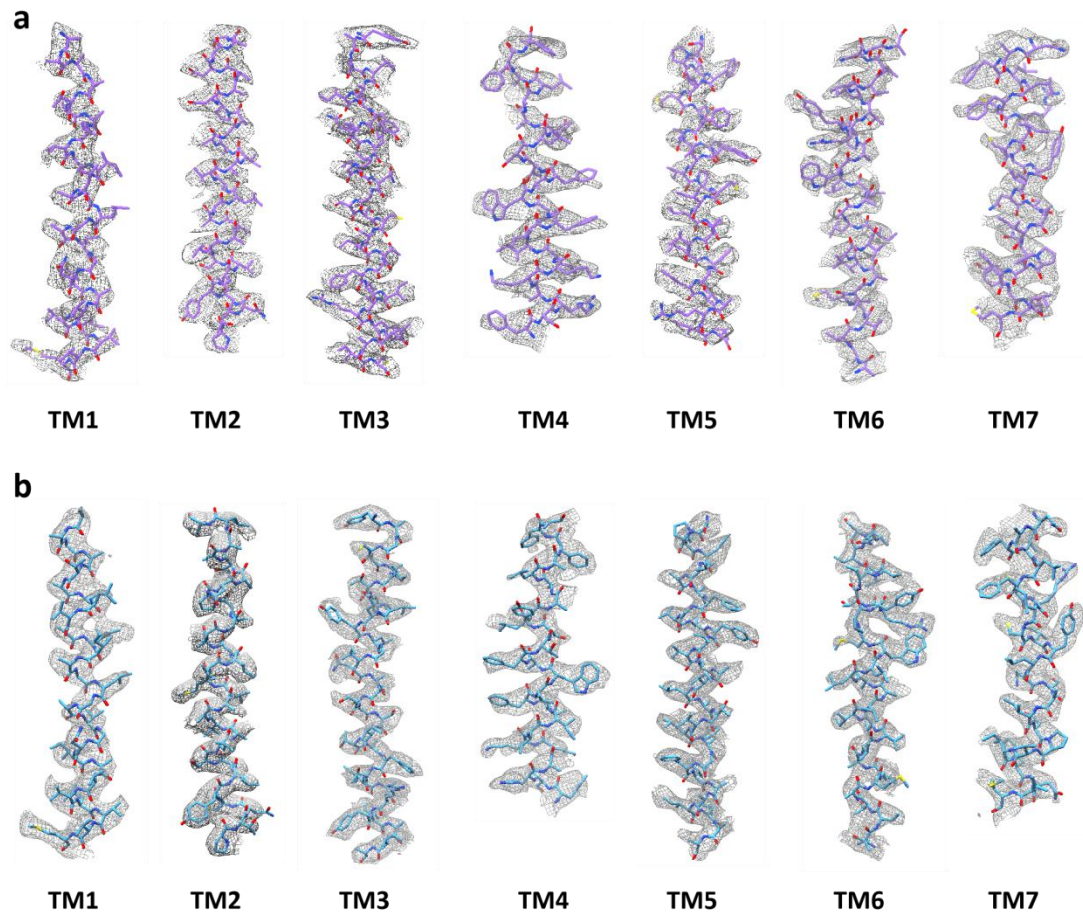

**Fig.S3 Cryo-EM densities of representative segments of TRH or TAL bound TRHR-Gq complex.**

**a,b** Cryo-EM density maps and models of transmembrane domain of TRHR-Gq/TRH complex (**a**) and TRHR-Gq/TAL complex (**b**). The cryo-EM maps are shown in mesh and molecular models as stick representation.



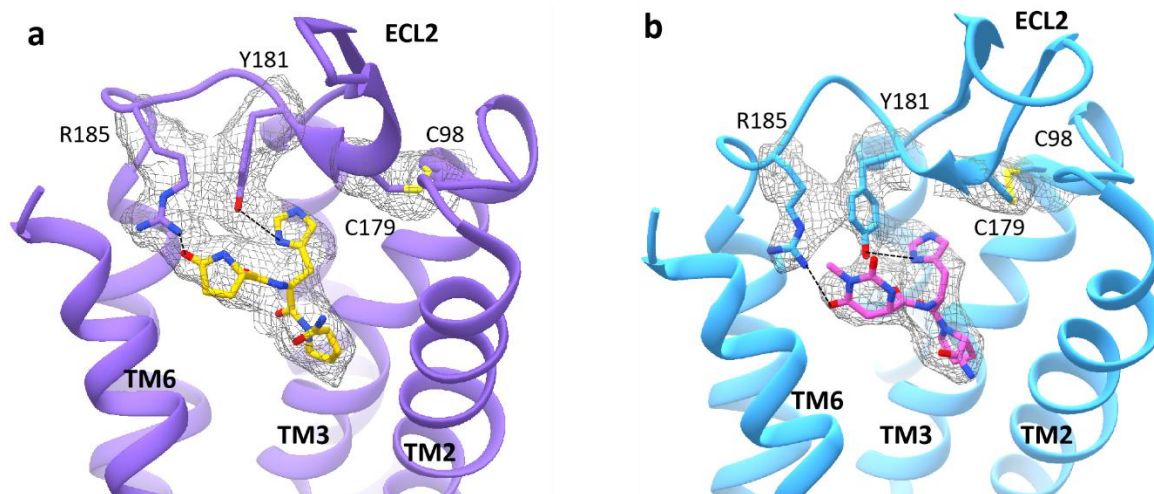

**Fig. S4 The ECL2 interactions with TRH and TAL.**

**a,b** ECL2 interactions of TRH (yellow)-bound TRHR (purple)(**a**). ECL2 interactions of TAL (magenta)-bound TRHR (blue)(**b**). The density maps of R185, Y181, C179, and both ligands are shown in mesh.

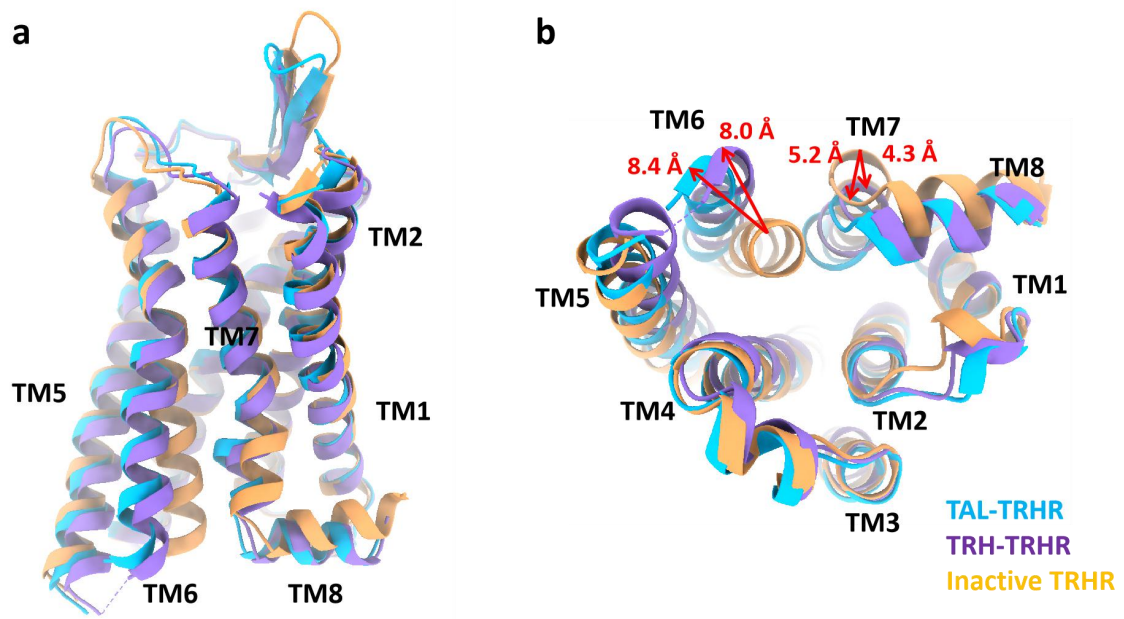

**Fig. S5 Conformational changes after activation of TRHR receptor.**

**a,b** Side (a) and top (b) views of alignment of active TAL-bound TRHR (blue), TRH-bound TRHR (purple) and alphafold simulative inactive (orange) TRHR receptor.

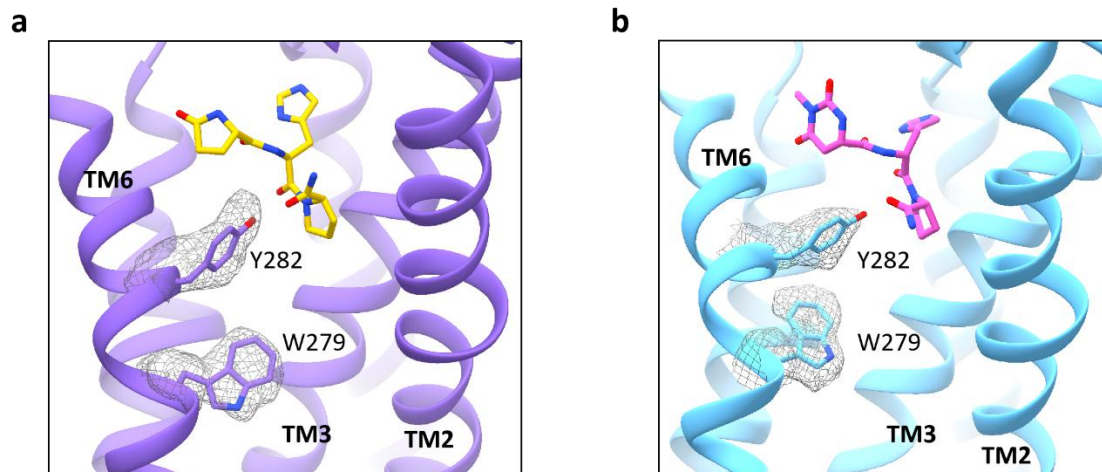

**Fig. S6** The electron density maps of "toggle switch" in TRH or TAL-bound TRHR.

The density maps of Y282 and W279 are shown in the TRH(a) and TAL(b)-bound TRHR.

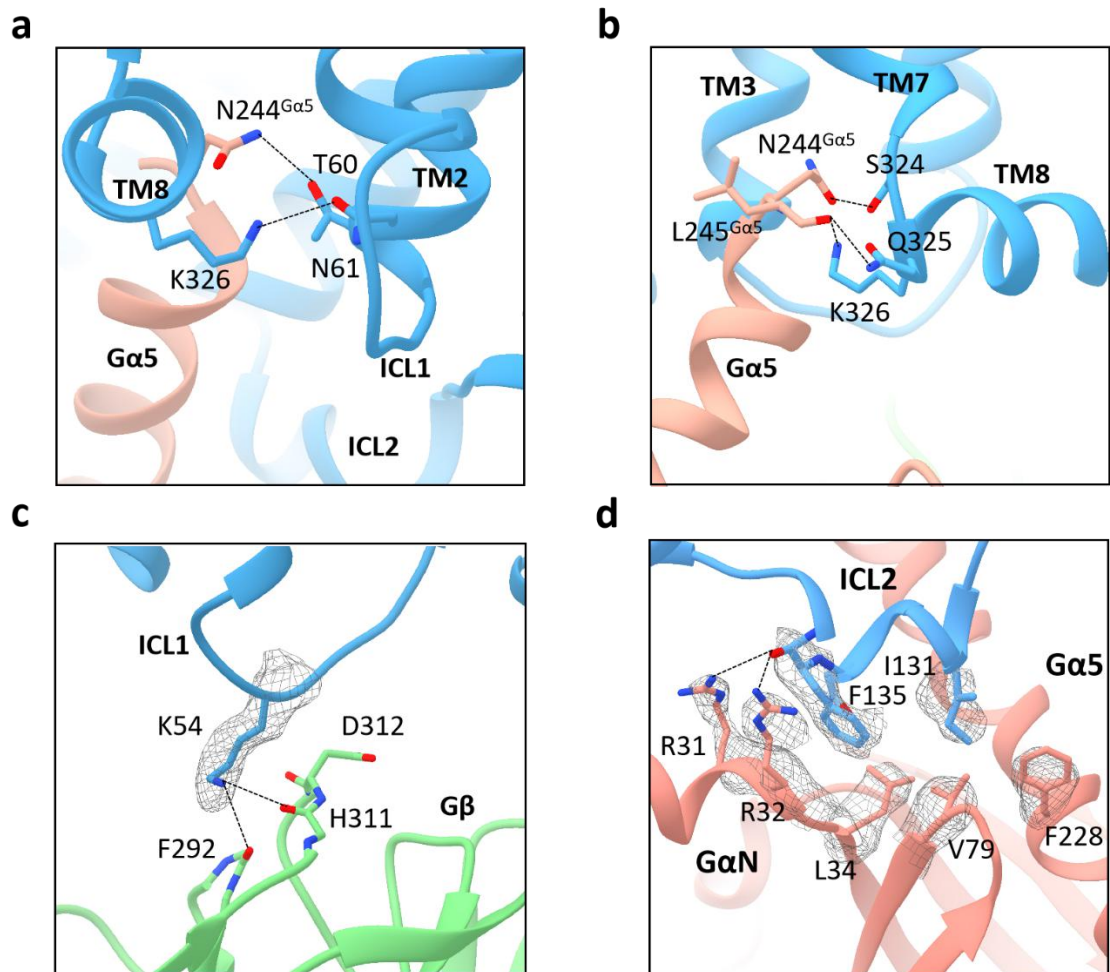

**Fig. S7 The interaction interface of TAL-bound TRHR and G protein.**

**a** The TM2 and TM8 work together to stabilize the interaction with  $G\alpha 5$  helix. **b** The interaction interface of TM7-TM8 linker and  $G\alpha 5$  helix of TRHR-Gq/TAL complex. **c,d** The interaction interface between ICL1(**c**) and ICL2(**d**) with G protein of TAL-TRHR-Gq complex. The local density maps are shown in mesh.

**a**

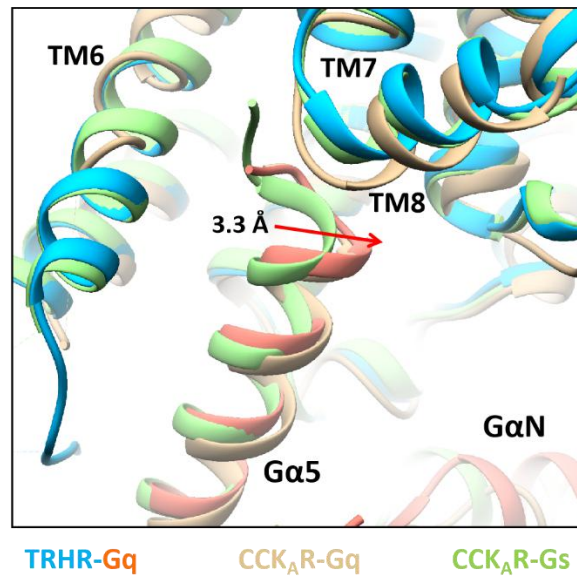

**Fig. S8 Comparison of TAL-bound TRHR-Gq, CCK<sub>A</sub>R-Gq and CCK<sub>A</sub>R-Gs complexes.**

**a** Compare the Ga5 helix of TAL-bound TRHR-Gq (Salmon) with that of the CCK<sub>A</sub>R-Gq (wheat)(PDB:7EZM) and CCK<sub>A</sub>R-Gs complex (green)(PDB:7EZK).

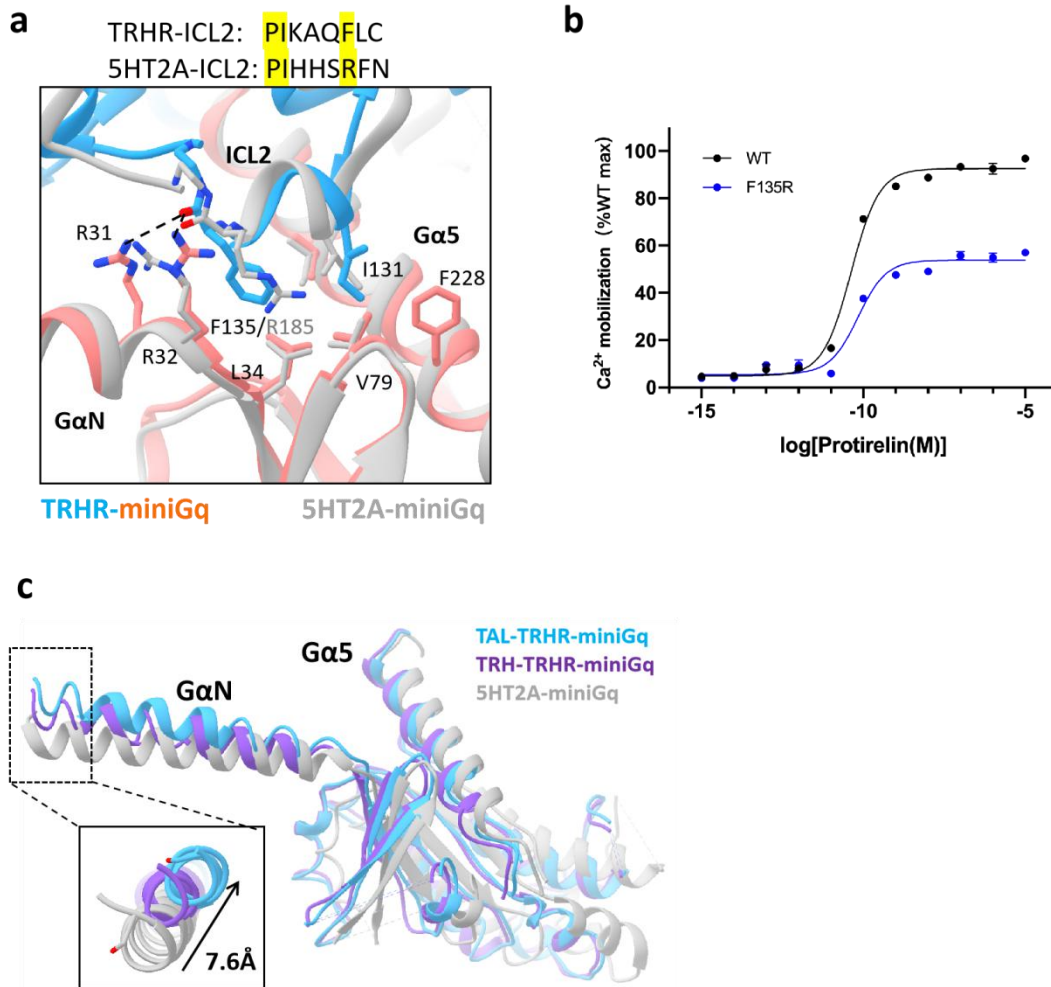

**Fig. S9. The role of ICL2 in G protein signal regulation.**

**a** Structure comparison of TAL bound TRHR-Gq complex and 5HT<sub>2A</sub>-Gq complex with ICL2-Gq interface. The amino acids that interact with G proteins are shown in yellow. **b** Functional experiments indicate that TRHR may adopt different signaling pathway selection patterns from 5HT<sub>2A</sub>. The data represent mean  $\pm$  s.e.m. of three independent experiments performed in triplicates. **c** Structure comparison of the Gq proteins of TAL-TRHR, TRH-TRHR and 5HT<sub>2A</sub>-miniGq complex.

**Table S1 | Statistics of cryo-EM data collection, 3D reconstruction and model refinement.**

| <b>Data Collection</b>                             |                 |                 |
|----------------------------------------------------|-----------------|-----------------|
| <b>Protein</b>                                     | TRH-TRHR        | TAL-TRHR        |
| <b>Microscope</b>                                  | FEI Titan Krios | FEI Titan Krios |
| <b>Voltage (kV)</b>                                | 300             | 300             |
| <b>Detector</b>                                    | Gatan K3 Summit | Gatan K3 Summit |
| <b>Detector mode</b>                               | Super           | Super           |
| <b>Pixel size (Å)</b>                              | 0.535           | 0.535           |
| <b>Defocus range (µm)</b>                          | -1.2 ~ -2.2     | -1.2 ~ -2.2     |
| <b>Electron dose (e<sup>-</sup>/Å<sup>2</sup>)</b> | 55              | 55              |
| <b>Frames per image</b>                            | 30              | 30              |
| <b>Exposure time (s)</b>                           | 3.5             | 3.5             |
| <b>Number of images</b>                            | 2,703           | 3,321           |
| <b>3D reconstruction</b>                           |                 |                 |
| <b>Final Particle number</b>                       | 870,595         | 394,270         |
| <b>Symmetry</b>                                    | C1              | C1              |
| <b>Overall resolution (Å)</b>                      | 3.19            | 3.26            |
| <b>Model refinement</b>                            |                 |                 |
| <b>Model composition</b>                           |                 |                 |
| <b>Chains</b>                                      | 6               | 6               |
| <b>Ligands</b>                                     | LIG:1           | LIG:1           |
| <b>Non-hydrogen atoms</b>                          | 7,494           | 7,482           |
| <b>Protein residues</b>                            | 1,079           | 1,078           |
| <b>Bonds (RMSD)</b>                                |                 |                 |
| <b>Length (Å)</b>                                  | 0.006           | 0.005           |
| <b>Angles (°)</b>                                  | 1.010           | 0.940           |

**Ramachandran plot (%)**

|                             |       |       |
|-----------------------------|-------|-------|
| <b>Outliers</b>             | 0.00  | 0.00  |
| <b>Allowed</b>              | 9.74  | 8.65  |
| <b>Favored</b>              | 90.26 | 91.35 |
| <b>Rotamer outliers (%)</b> | 0.76  | 1.20  |
| <b>MolProbity score</b>     | 1.87  | 1.84  |
| <b>Clash score</b>          | 6.02  | 5.10  |

---



**Table S2 | Ca<sup>2+</sup> mobilization assay of wild-type and mutant TRHRs activation by Protirelin or Taltirelin.** pEC<sub>50</sub> values represent the negative logarithm of agonist concentration that produces half maximal response. Emax values are maximal response as percentage of wild-type TRHR response. All values are expressed as mean ± s.e.m. of three independent experiments conducted in triplicate.

|       | Protirelin   |               |                   |               | Taltirelin   |               |                   |               | Expression<br>(% of WT) |
|-------|--------------|---------------|-------------------|---------------|--------------|---------------|-------------------|---------------|-------------------------|
|       | EC50<br>(nM) | Fold<br>shift | Mean±SEM(n)       |               | EC50<br>(nM) | Fold<br>shift | Mean±SEM(n)       |               |                         |
|       |              |               | pEC <sub>50</sub> | Emax          |              |               | pEC <sub>50</sub> | Emax          |                         |
| WT    | 0.014        | 1             | 10.85±0.03(3)     | 100(3)        | 0.453        | 1             | 9.37±0.04(3)      | 100(3)        | 100(6)                  |
| Q105A | 1.833        | 129           | 8.77±0.12(3)      | 42.84±5.16(3) | 3.637        | 8             | 8.16±0.18(3)      | 73.48±2.24(3) | 76.36±3.91(3)           |
| Y106A | nd           | nd            | nd                | nd            | 264.6        | 585           | 6.30±0.18(3)      | 51.21±4.87(3) | 98.82±4.73(3)           |
| Y192A | 8163         | 574454        | 5.13±0.13(3)      | 62.16±4.88(3) | /            | /             | /                 | /             | 120.67±8.77(3)          |
| Y282A | nd           | nd            | nd                | nd            | nd           | nd            | nd                | nd            | 83.36±3.52(3)           |
| N289A | 30.01        | 2112          | 7.57±0.14(3)      | 66.16±3.85(3) | 322.2        | 712           | 6.51±0.07(3)      | 53.60±3.00(3) | 60.84±3.36(3)           |
| R306A | 282.30       | 19904         | 6.55±0.02(3)      | 39.71±6.43(3) | 608.5        | 1345          | 6.12±0.27(3)      | 44.97±7.32(3) | 52.34±0.83(3)           |
| F135R | 0.028        | 2.0           | 10.60±0.14(3)     | 55.21±5.13(3) |              |               |                   |               | 119.70±1.46(3)          |
